# Supplementary material for: The NUTRIENT Trial (NUTRitional Intervention among myEloproliferative Neoplasms): Feasibility Phase
Source: bioRxiv or medRxiv preprint supplement (doi:10.1101/2023.05.09.23289740), 2023-05-12
Supplement: Supplementary file [file media-1.pdf]

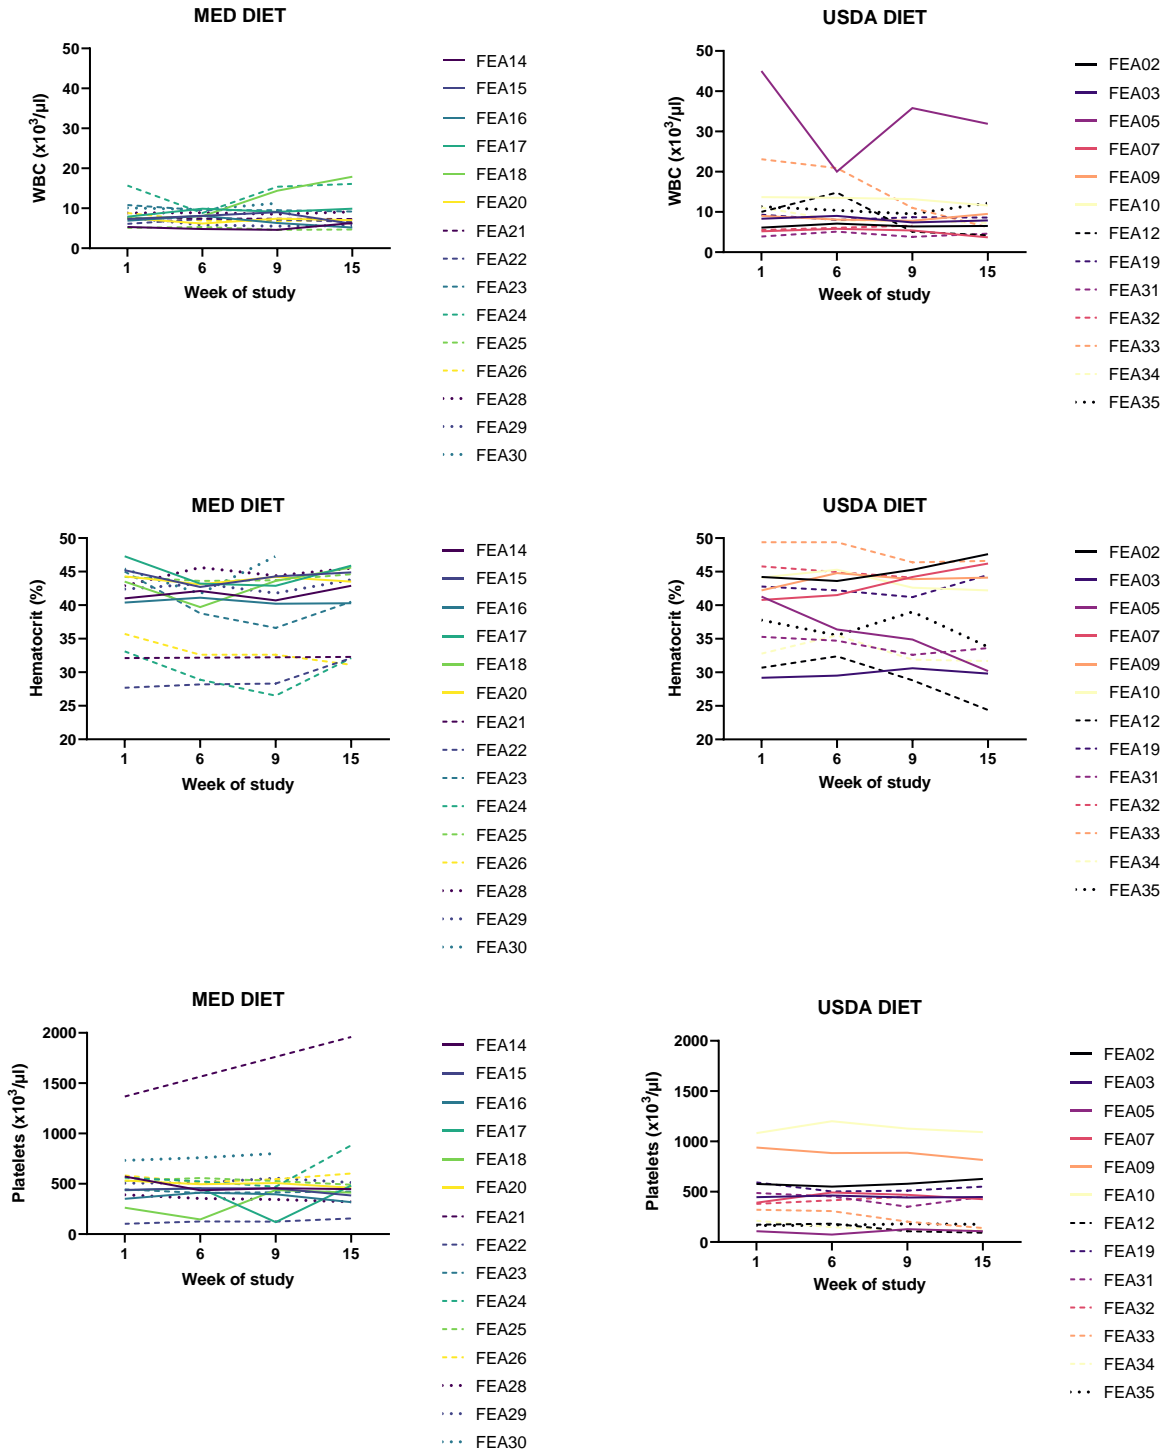

**Supplemental Figure 1.** Complete blood count (CBC) data from participants. CBC's were collected at weeks 1, 6, 9, and 15 from participants to monitor for changes in blood counts.

**A**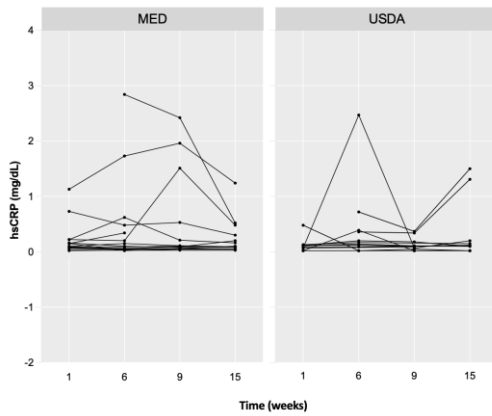**B**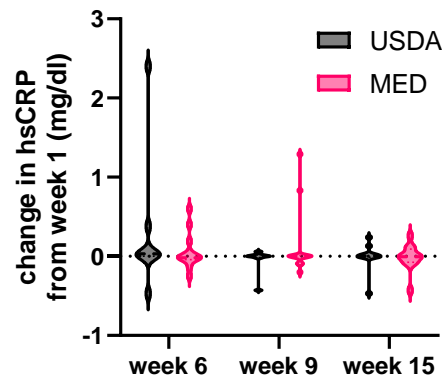

**Supplemental Figure 2. Changes in hsCRP during the study. A)** Spaghetti plot demonstrating raw hsCRP values for each participant during the course of the study, **B)** Violin plot depicting change in hsCRP at weeks 6, 9, and 15 using week 1 as baseline.

**Supplemental Figure 3. Changes in  $JAK2^{V617F}$  allele burden over time.** Whole blood from (A) USDA and (B) MED diet groups was subjected to digital PCR to quantify  $JAK2^{V617F}$  allele burden.

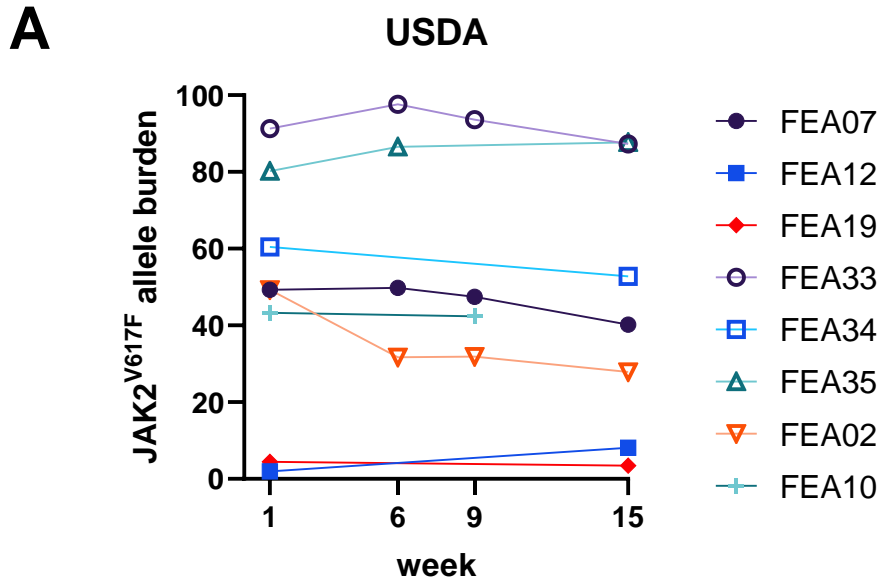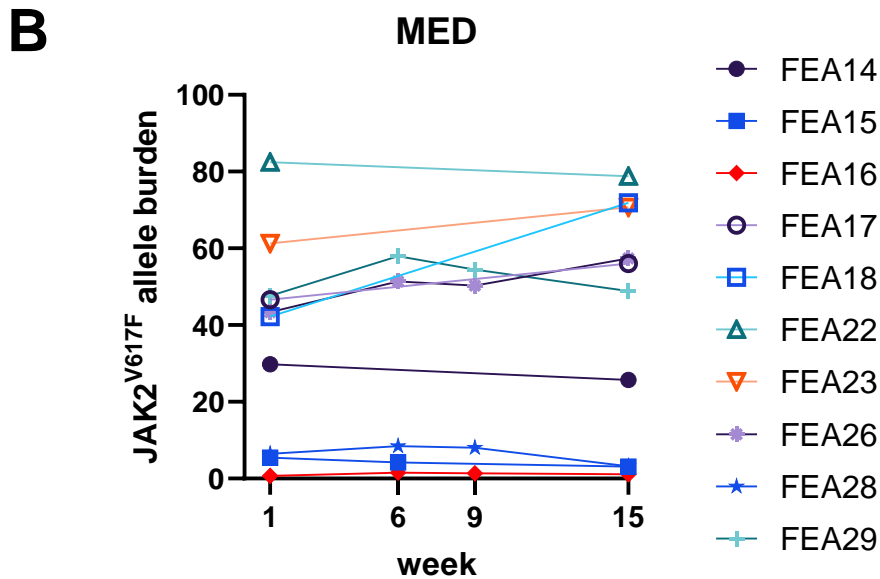

## Supplemental Table 1 – Inclusion and Exclusion Criteria

### Inclusion Criteria

- Age > 18 with a diagnosis of a Philadelphia negative Myeloproliferative Neoplasm including Essential Thrombocythemia (ET), Polycythemia Vera (PV), or myelofibrosis (MF)
- Any type of MPN directed therapy is allowed
- EGOG performance status of <2
- Life expectancy > 20 weeks
- Has an email address and can access the internet
- Able to read and understand English

### Exclusion Criteria

- Pregnant or planning to become pregnant over the course of the study
- Weight loss of more than 10 pounds or 10% of the total body weight over the last 6 months
- History of allergic reactions attributed to nuts or olive oil

**Supplemental Table 2.** Longitudinal Complete Metabolic Panel Results for study cohort

|       | Diet Group | Week | Na  | K   | Cl  | CO2 | Glu | BUN | Cr  | GFR | Ca   | Pro | Alb | AP  | AST | ALT | Bili |
|-------|------------|------|-----|-----|-----|-----|-----|-----|-----|-----|------|-----|-----|-----|-----|-----|------|
| FEA02 | USDA       | 1    | 137 | 4   | 102 | 27  | 95  | 11  | 1   | >60 | 9.5  | 7.7 | 4.7 | 48  | 21  | 14  | 1.6  |
|       |            | 6    | 137 | 3.9 | 104 | 24  | 102 | 16  | 1.1 | >60 | 9.5  | 7.7 | 4.6 | 54  | 23  | 18  | 1.3  |
|       |            | 9    | 139 | 4   | 104 | 27  | 91  | 12  | 1   | >60 | 9.3  | 7.6 | 4.5 | 56  | 22  | 16  | 1.1  |
|       |            | 15   | 137 | 3.6 | 103 | 27  | 93  | 15  | 1.2 | 60  | 9.5  | 7.6 | 4.8 | 55  | 30  | 24  | 1.5  |
| FEA03 | USDA       | 1    | 139 | 4.2 | 104 | 26  | 97  | 17  | 0.8 | >60 | 9.6  | 6.9 | 4.4 | 52  | 19  | 11  | 0.3  |
|       |            | 6    | 139 | 4.5 | 103 | 27  | 97  | 20  | 0.8 | >60 | 9.4  | 7   | 4.3 | 60  | 18  | 13  | 0.3  |
|       |            | 9    | 139 | 4.4 | 104 | 27  | 99  | 21  | 0.7 | >60 | 9.6  | 6.8 | 4.4 | 52  | 17  | 14  | 0.3  |
|       |            | 15   | 139 | 4.3 | 105 | 27  | 91  | 24  | 0.7 | >60 | 9.8  | 6.8 | 4.5 | 55  | 17  | 12  | 0.3  |
| FEA05 | USDA       | 1    | 137 | 4.2 | 104 | 25  | 101 | 19  | 1   | 56  | 9.9  | 6.9 | 4   | 54  | 57  | 26  | 2.6  |
|       |            | 6    | 135 | 4   | 103 | 25  | 106 | 12  | 0.8 | >60 | 9.1  | 7.3 | 3.3 | 48  | 41  | 19  | 2.1  |
|       |            | 9    | 137 | 3.8 | 104 | 27  | 101 | 10  | 0.8 | >60 | 9.3  | 7.4 | 3.4 | 51  | 51  | 23  | 2.3  |
|       |            | 15   | 133 | 4.2 | 102 | 25  | 88  | 8   | 0.6 | >60 | 8.9  | 6.9 | 3.4 | 50  | 47  | 24  | 2.2  |
| FEA07 | USDA       | 1    | 136 | 3.8 | 102 | 26  | 94  | 13  | 0.6 | >60 | 9    | 7.5 | 3.9 | 140 | 37  | 50  | 0.6  |
|       |            | 6    | 138 | 4.1 | 105 | 27  | 81  | 14  | 0.7 | >60 | 9.4  | 7.4 | 4.1 | 98  | 28  | 37  | 0.5  |
|       |            | 9    | 135 | 4   | 101 | 29  | 70  | 19  | 0.7 | >60 | 9.8  | 7.5 | 4.2 | 100 | 36  | 54  | 0.6  |
|       |            | 15   | 136 | 4.1 | 102 | 31  | 74  | 13  | 0.7 | >60 | 10.1 | 8.1 | 4.5 | 106 | 30  | 33  | 0.6  |
| FEA09 | USDA       | 1    | 138 | 3.9 | 104 | 28  | 123 | 14  | 0.8 | >60 | 9.5  | 7.4 | 4.4 | 75  | 28  | 29  | 0.5  |
|       |            | 6    | 137 | 4.2 | 100 | 30  | 146 | 20  | 0.9 | >60 | 9.8  | 7.6 | 4.6 | 79  | 36  | 30  | 0.6  |
|       |            | 9    | 138 | 4.2 | 104 | 26  | 145 | 24  | 0.9 | >60 | 9.9  | 7.5 | 4.5 | 72  | 30  | 24  | 0.6  |
|       |            | 15   | 139 | 3.9 | 102 | 29  | 139 | 16  | 0.9 | >60 | 9.7  | 7.4 | 4.6 | 71  | 25  | 17  | 0.7  |
| FEA10 | USDA       | 1    | 137 | 4.3 | 102 | 30  | 86  | 14  | 1   | >60 | 9.7  | 7   | 4.3 | 54  | 17  | 12  | 1    |
|       |            | 6    | 140 | 4.6 | 106 | 28  | 88  | 17  | 0.9 | >60 | 9.8  | 7   | 4.7 | 64  | 18  | 14  | 0.6  |
|       |            | 9    | 138 | 4.8 | 104 | 27  | 72  | 17  | 0.9 | >60 | 10   | 7.2 | 4.5 | 58  | 24  | 16  | 1    |
|       |            | 15   | 135 | 4.1 | 102 | 28  | 64  | 14  | 0.8 | >60 | 9.5  | 6.7 | 4.6 | 46  | 23  | 21  | 0.5  |
| FEA12 | USDA       | 1    | 136 | 4.6 | 105 | 25  | 95  | 23  | 1.2 | 59  | 9.2  | 7.8 | 4.6 | 31  | 19  | 17  | 0.7  |
|       |            | 6    | 137 | 4.5 | 104 | 22  | 104 | 29  | 1.4 | 49  | 9.6  | 8.2 | 4.4 | 59  | 23  | 34  | 0.8  |
|       |            | 9    | 138 | 4.7 | 107 | 23  | 110 | 19  | 1.3 | 54  | 9.1  | 7.6 | 4.2 | 35  | 21  | 17  | 0.8  |
|       |            | 15   | 136 | 4.7 | 107 | 23  | 97  | 27  | 1.2 | 59  | 9.4  | 7.8 | 4.4 | 41  | 22  | 19  | 0.8  |

|       |      |    |     |     |     |    |     |    |      |     |     |     |     |     |    |     |     |
|-------|------|----|-----|-----|-----|----|-----|----|------|-----|-----|-----|-----|-----|----|-----|-----|
| FEA19 | USDA | 1  | 138 | 4.1 | 104 | 25 | 82  | 16 | 0.8  | >60 | 9.8 | 7.3 | 4.4 | 61  | 21 | 20  | 0.4 |
|       |      | 6  | 140 | 4   | 106 | 28 | 96  | 9  | 0.8  | >60 | 9.4 | 7.1 | 4.3 | 62  | 20 | 18  | 0.5 |
|       |      | 9  | 139 | 3.6 | 107 | 27 | 87  | 15 | 0.8  | >60 | 9.4 | 7.2 | 4.4 | 62  | 22 | 19  | 0.6 |
|       |      | 15 |     |     |     |    |     |    |      |     |     |     |     |     |    |     |     |
| FEA31 | USDA | 1  | 126 | 3.5 | 95  | 27 | 74  | 12 | 0.5  | >60 | 9.1 | 6.9 | 4.4 | 56  | 21 | 16  | 0.4 |
|       |      | 6  | 128 | 4.8 | 96  | 27 | 88  | 13 | 0.54 | 98  | 9   | 6.5 | 4.1 | 66  | 16 | 12  | 0.4 |
|       |      | 9  | 128 | 4.6 | 97  | 27 | 110 | 15 | 0.62 | 93  | 8.8 | 6   | 4   | 59  | 18 | 14  | 0.4 |
|       |      | 15 | 128 | 4.8 | 95  | 25 | 113 | 16 | 0.57 | 96  | 9.3 | 6.6 | 4.3 | 62  | 15 | 13  | 0.3 |
| FEA32 | USDA | 1  | 137 | 4   | 102 | 27 | 80  | 11 | 0.7  | >60 | 9.9 | 7.1 | 4.5 | 71  | 19 | 11  | 0.7 |
|       |      | 6  |     |     |     |    |     |    |      |     |     |     |     |     |    |     |     |
|       |      | 9  |     |     |     |    |     |    |      |     |     |     |     |     |    |     |     |
|       |      | 15 |     |     |     |    |     |    |      |     |     |     |     |     |    |     |     |
| FEA33 | USDA | 1  | 138 | 4   | 102 | 28 | 74  | 11 | 0.7  | >60 | 9.7 | 7.9 | 4.8 | 109 | 21 | 14  | 0.7 |
|       |      | 6  | 137 | 4.2 | 102 | 29 | 74  | 8  | 0.6  | >60 | 9.6 | 7.6 | 4.7 | 103 | 22 | 17  | 0.7 |
|       |      | 9  | 138 | 4   | 103 | 28 | 99  | 10 | 0.6  | >60 | 9.3 | 7.3 | 4.4 | 89  | 19 | 16  | 0.6 |
|       |      | 15 | 137 | 4.3 | 102 | 30 | 86  | 12 | 0.7  | >60 | 9.3 | 7.5 | 4.4 | 77  | 21 | 15  | 0.7 |
| FEA34 | USDA | 1  | 135 | 3.7 | 103 | 25 | 73  | 12 | 0.8  | >60 | 9.2 | 6.6 | 4.3 | 58  | 29 | 15  | 1.1 |
|       |      | 6  | 139 | 3.9 | 106 | 26 | 99  | 13 | 0.8  | >60 | 9.1 | 6.9 | 4.3 | 75  | 57 | 78  | 0.9 |
|       |      | 9  | 137 | 4   | 107 | 25 | 80  | 12 | 0.8  | >60 | 8.9 | 6.3 | 4.2 | 73  | 69 | 86  | 1.1 |
|       |      | 15 | 136 | 4.4 | 105 | 26 | 107 | 16 | 0.9  | >60 | 8.9 | 6.5 | 4.3 | 72  | 86 | 106 | 0.9 |
| FEA35 | USDA | 1  | 140 | 4   | 102 | 33 | 63  | 12 | 0.4  | >60 | 9.9 | 7.6 | 4.7 | 141 | 27 | 23  | 0.9 |
|       |      | 6  | 139 | 4.5 | 101 | 31 | 103 | 11 | 0.5  | >60 | 9.9 | 7.8 | 4.7 | 147 | 31 | 28  | 0.9 |
|       |      | 9  | 140 | 4.2 | 103 | 30 | 93  | 11 | 0.4  | >60 | 9.4 | 7   | 4.3 | 125 | 28 | 25  | 0.7 |
|       |      | 15 | 136 | 4.2 | 100 | 30 | 112 | 14 | 0.4  | >60 | 9.4 | 7.1 | 4.4 | 132 | 28 | 26  | 0.8 |
| FEA14 | MED  | 1  | 137 | 4.3 | 102 | 26 | 9   | 74 | 10   | 0.5 | >60 | 10  | 7.9 | 4.2 | 56 | 20  | 15  |
|       |      | 6  | 136 | 4   | 101 | 28 | 7   | 82 | 11   | 0.5 | >60 | 9.9 | 8   | 4.5 | 51 | 19  | 14  |
|       |      | 9  | 137 | 3.9 | 104 | 28 | 5   | 93 | 11   | 0.5 | >60 | 9.8 | 7.9 | 4.4 | 54 | 20  | 14  |
|       |      | 15 | 141 | 4   | 105 | 30 | 6   | 74 | 12   | 0.5 | >60 | 9.8 | 8.1 | 4.4 | 61 | 19  | 15  |
| FEA15 | MED  | 1  | 139 | 3.9 | 103 | 28 | 8   | 87 | 15   | 0.9 | >60 | 9.9 | 7.2 | 4.3 | 91 | 19  | 13  |
|       |      | 6  | 137 | 3.9 | 101 | 29 | 7   | 78 | 17   | 0.9 | >60 | 9.3 | 7.1 | 4.2 | 97 | 20  | 12  |

|       |     |    |     |     |     |    |    |     |    |     |     |      |     |     |     |    |    |
|-------|-----|----|-----|-----|-----|----|----|-----|----|-----|-----|------|-----|-----|-----|----|----|
|       |     | 9  | 137 | 3.7 | 101 | 27 | 9  | 56  | 17 | 0.9 | >60 | 9.6  | 7.2 | 4.2 | 102 | 22 | 15 |
|       |     | 15 | 140 | 3.7 | 102 | 28 | 10 | 69  | 21 | 0.9 | >60 | 9.4  | 7.4 | 4.2 | 94  | 20 | 12 |
| FEA16 | MED | 1  | 140 | 3.9 | 103 | 31 | 6  | 86  | 15 | 0.6 | >60 | 9.9  | 6.7 | 4   | 74  | 16 | 14 |
|       |     | 6  | 139 | 3.8 | 103 | 31 | 5  | 92  | 20 | 0.6 | >60 | 9.8  | 6.9 | 4.3 | 65  | 16 | 13 |
|       |     | 9  | 140 | 4.1 | 103 | 30 | 7  | 87  | 21 | 0.6 | >60 | 9.6  | 6.6 | 4   | 80  | 16 | 15 |
|       |     | 15 | 141 | 4   | 104 | 30 | 7  | 75  | 14 | 0.5 | >60 | 9.1  | 6.3 | 4   | 90  | 24 | 33 |
| FEA17 | MED | 1  | 140 | 4.1 | 105 | 28 | 7  | 81  | 14 | 1   | 57  | 9.8  | 7.2 | 4.2 | 75  | 22 | 21 |
|       |     | 6  | 140 | 4.3 | 102 | 29 | 9  | 93  | 19 | 0.9 | >60 | 10   | 7.3 | 4.3 | 83  | 21 | 18 |
|       |     | 9  | 142 | 3.9 | 103 | 30 | 9  | 61  | 14 | 1   | 57  | 9.7  | 7   | 4.3 | 84  | 22 | 19 |
|       |     | 15 | 139 | 4.1 | 101 | 29 | 9  | 68  | 18 | 1   | 57  | 10.1 | 7.6 | 4.5 | 96  | 27 | 27 |
| FEA18 | MED | 1  | 136 | 4.5 | 104 | 26 | 6  | 100 | 14 | 1   | >60 | 9.3  | 7.1 | 4.3 | 108 | 18 | 14 |
|       |     | 6  | 137 | 4.3 | 105 | 24 | 8  | 86  | 14 | 0.9 | >60 | 9.4  | 7.1 | 4   | 106 | 15 | 10 |
|       |     | 9  | 138 | 5   | 103 | 26 | 9  | 104 | 15 | 1   | >60 | 9    | 7.1 | 4.1 | 122 | 20 | 12 |
|       |     | 15 | 139 | 3.9 | 100 | 27 | 12 | 37  | 19 | 1   | >60 | 9.6  | 7.3 | 4.4 | 119 | 16 | 10 |
| FEA20 | MED | 1  | 140 | 5   | 104 | 32 | 4  | 99  | 14 | 1   | >60 | 10.1 | 7   | 4.7 | 75  | 22 | 25 |
|       |     | 6  | 139 | 4.9 | 104 | 31 | 4  | 90  | 15 | 1.1 | >60 | 9.5  | 6.5 | 4.2 | 61  | 24 | 21 |
|       |     | 9  | 140 | 4.8 | 105 | 30 | 5  | 109 | 16 | 1   | >60 | 9.8  | 6.6 | 4.4 | 60  | 24 | 23 |
|       |     | 15 | 134 | 4.1 | 101 | 27 | 6  | 95  | 12 | 1   | >60 | 9.6  | 6.7 | 4.3 | 71  | 25 | 25 |
| FEA21 | MED | 1  | 139 | 4.6 | 105 | 27 | 7  | 91  | 8  | 0.6 | >60 | 9.3  | 7.1 | 4.3 | 39  | 20 | 16 |
|       |     | 6  |     |     |     |    |    |     |    |     |     |      |     |     |     |    |    |
|       |     | 9  |     |     |     |    |    |     |    |     |     |      |     |     |     |    |    |
|       |     | 15 | 136 | 3.7 | 101 | 28 | 7  | 83  | 15 | 0.7 | >60 | 10.7 | 7.8 | 4.7 | 38  | 43 | 44 |
| FEA22 | MED | 1  | 141 | 4.8 | 111 | 25 | 5  | 106 | 21 | 0.7 | >60 | 9.3  | 6.4 | 4.3 | 61  | 13 | 9  |
|       |     | 6  | 144 | 5.4 | 109 | 25 | 10 | 86  | 17 | 0.8 | >60 | 9.6  | 6.9 | 4.6 | 65  | 14 | 9  |
|       |     | 9  | 143 | 5.1 | 110 | 26 | 7  | 91  | 26 | 0.8 | >60 | 9.9  | 6.9 | 4.7 | 61  | 12 | 6  |
|       |     | 15 | 140 | 5.3 | 110 | 26 | 4  | 97  | 22 | 0.9 | >60 | 9.9  | 6.8 | 4.6 | 60  | 15 | 10 |
| FEA23 | MED | 1  | 140 | 3.5 | 102 | 32 | 6  | 77  | 19 | 0.8 | >60 | 9.8  | 7.4 | 4.7 | 90  | 37 | 34 |
|       |     | 6  | 141 | 3.2 | 103 | 30 | 8  | 76  | 23 | 0.8 | >60 | 9.6  | 7.2 | 4.9 | 84  | 36 | 32 |
|       |     | 9  | 140 | 3.7 | 104 | 31 | 5  | 85  | 15 | 0.7 | >60 | 9.5  | 6.8 | 4.7 | 90  | 55 | 59 |
|       |     | 15 | 140 | 4.1 | 101 | 32 | 7  | 76  | 20 | 0.8 | >60 | 10.2 | 7.3 | 4.9 | 81  | 38 | 32 |





**Supplemental Table 3.** Longitudinal Lipid Panels for Study Cohort

|       | Week | Diet Group | Tot Chol | TG  | HDL | LDL | VLDL | Non-HDL |
|-------|------|------------|----------|-----|-----|-----|------|---------|
| FEA02 | 1    | USDA       | 227      | 159 | 53  | 142 | 32   | 174     |
|       | 6    |            | 227      | 120 | 57  | 146 | 24   | 170     |
|       | 9    |            | 227      | 156 | 51  | 145 | 31   | 176     |
|       | 15   |            | 258      | 122 | 57  | 177 | 24   | 201     |
| FEA03 | 1    | USDA       | 186      | 200 | 41  | 105 | 40   | 145     |
|       | 6    |            | 222      | 159 | 47  | 143 | 32   | 175     |
|       | 9    |            | 208      | 169 | 48  | 126 | 34   | 160     |
|       | 15   |            | 209      | 126 | 49  | 135 | 25   | 160     |
| FEA05 | 1    | USDA       | 168      | 109 | 47  | 108 | 10   |         |
|       | 6    |            | 123      | 131 | 21  | 76  | 26   | 102     |
|       | 9    |            | 113      | 120 | 20  | 69  | 23   | 93      |
|       | 15   |            | 119      | 126 | 18  | 76  | 25   | 101     |
| FEA07 | 1    | USDA       | 164      | 135 | 42  | 95  | 27   | 122     |
|       | 6    |            | 161      | 94  | 48  | 94  | 19   | 113     |
|       | 9    |            | 176      | 95  | 55  | 102 | 19   | 121     |
|       | 15   |            | 177      | 104 | 49  | 107 | 21   | 128     |
| FEA09 | 1    | USDA       |          |     |     |     |      |         |
|       | 6    |            | 161      | 84  | 57  | 87  | 17   | 104     |
|       | 9    |            | 172      | 120 | 48  | 100 | 24   | 124     |
|       | 15   |            | 135      | 97  | 44  | 72  | 19   | 91      |
| FEA10 | 1    | USDA       | 92       | 58  | 38  | 42  | 12   | 54      |
|       | 6    |            | 88       | 51  | 45  | 33  | 10   | 43      |
|       | 9    |            | 97       | 36  | 47  | 43  | 7    | 50      |
|       | 15   |            | 84       | 54  | 44  | 29  | 11   | 40      |
| FEA12 | 1    | USDA       |          |     |     |     |      |         |
|       | 6    |            | 76       | 60  | 23  | 41  | 12   | 53      |
|       | 9    |            | 83       | 78  | 35  | 32  | 16   | 48      |
|       | 15   |            | 69       | 62  | 27  | 30  | 12   | 42      |
| FEA19 | 1    | USDA       | 314      | 183 | 62  | 215 | 37   | 252     |
|       | 6    |            | 245      | 155 | 48  | 166 | 31   | 197     |
|       | 9    |            | 272      | 112 | 56  | 194 | 22   | 216     |
|       | 15   |            |          |     |     |     |      |         |
| FEA31 | 1    | USDA       | 185      | 59  | 58  | 115 | 12   | 127     |
|       | 6    |            |          |     |     |     |      |         |
|       | 9    |            |          |     |     |     |      |         |
|       | 15   |            |          |     |     |     |      |         |
| FEA32 | 1    | USDA       | 281      | 112 | 69  | 190 | 22   | 212     |
|       | 6    |            |          |     |     |     |      |         |
|       | 9    |            |          |     |     |     |      |         |

|       |    |      |     |     |    |     |    |     |
|-------|----|------|-----|-----|----|-----|----|-----|
|       | 15 |      |     |     |    |     |    |     |
| FEA33 | 1  | USDA | 218 | 353 | 59 | 88  | 71 | 159 |
|       | 6  |      | 200 | 125 | 56 | 119 | 25 | 144 |
|       | 9  |      | 204 | 220 | 58 | 102 | 44 | 146 |
|       | 15 |      | 196 | 169 | 66 | 96  | 34 | 130 |
| FEA34 | 1  | USDA | 117 | 157 | 51 | 35  | 31 | 66  |
|       | 6  |      | 105 | 81  | 44 | 45  | 16 | 61  |
|       | 9  |      | 110 | 88  | 50 | 42  | 18 | 60  |
|       | 15 |      | 105 | 89  | 48 | 39  | 18 | 57  |
| FEA35 | 1  | USDA | 138 | 381 | 26 | 36  | 76 | 112 |
|       | 6  |      | 145 | 160 | 33 | 80  | 32 | 112 |
|       | 9  |      |     |     |    |     |    |     |
|       | 15 |      | 130 | 167 | 31 | 66  | 33 | 99  |
| FEA14 | 1  | MED  | 158 | 85  | 48 | 93  | 17 | 110 |
|       | 6  |      | 188 | 92  | 57 | 113 | 18 | 131 |
|       | 9  |      | 158 | 139 | 50 | 80  | 28 | 108 |
|       | 15 |      | 163 | 125 | 53 | 85  | 25 | 110 |
| FEA15 | 1  | MED  | 233 | 80  | 64 | 153 | 16 | 169 |
|       | 6  |      | 196 | 87  | 52 | 127 | 17 | 144 |
|       | 9  |      | 214 | 174 | 57 | 122 | 35 | 157 |
|       | 15 |      | 240 | 83  | 61 | 162 | 17 | 179 |
| FEA16 | 1  | MED  | 172 | 84  | 55 | 100 | 17 | 117 |
|       | 6  |      | 173 | 130 | 48 | 99  | 26 | 25  |
|       | 9  |      | 150 | 148 | 42 | 78  | 30 | 108 |
|       | 15 |      | 139 | 191 | 39 | 62  | 38 | 100 |
| FEA17 | 1  | MED  | 216 | 82  | 44 | 156 | 16 | 172 |
|       | 6  |      | 235 | 139 | 45 | 162 | 28 | 190 |
|       | 9  |      | 200 | 116 | 46 | 131 | 23 | 154 |
|       | 15 |      | 224 | 120 | 46 | 154 | 24 | 178 |
| FEA18 | 1  | MED  | 96  | 88  | 33 | 45  | 18 | 63  |
|       | 6  |      | 102 | 96  | 31 | 52  | 19 | 71  |
|       | 9  |      | 105 | 156 | 24 | 50  | 31 | 81  |
|       | 15 |      | 123 | 175 | 32 | 56  | 35 | 91  |
| FEA20 | 1  | MED  | 168 | 150 | 39 | 99  | 30 | 129 |
|       | 6  |      | 150 | 178 | 40 | 74  | 36 | 110 |
|       | 9  |      | 153 | 172 | 41 | 78  | 34 | 112 |
|       | 15 |      | 149 | 126 | 39 | 85  | 25 | 110 |
| FEA21 | 1  | MED  | 120 | 25  | 68 | 47  | 5  | 52  |
|       | 6  |      |     |     |    |     |    |     |
|       | 9  |      |     |     |    |     |    |     |
|       | 15 |      | 141 | 23  | 75 | 61  | 5  | 66  |
| FEA22 | 1  | MED  | 125 | 141 | 27 | 70  | 28 | 98  |

|       |    |     |     |     |    |     |    |     |
|-------|----|-----|-----|-----|----|-----|----|-----|
|       | 6  |     | 125 | 111 | 28 | 75  | 22 | 97  |
|       | 9  |     | 124 | 80  | 26 | 82  | 16 | 98  |
|       | 15 |     | 130 | 111 | 28 | 80  | 22 | 102 |
| FEA23 | 1  | MED | 251 | 74  | 94 | 142 | 15 | 157 |
|       | 6  |     | 214 | 79  | 84 | 114 | 16 | 130 |
|       | 9  |     | 206 | 71  | 83 | 109 | 14 | 123 |
|       | 15 |     | 223 | 96  | 97 | 107 | 19 | 126 |
| FEA24 | 1  | MED | 217 | 107 | 77 | 119 | 21 | 40  |
|       | 6  |     | 207 | 98  | 66 | 121 | 20 | 141 |
|       | 9  |     | 209 | 71  | 65 | 130 | 14 | 144 |
|       | 15 |     | 205 | 110 | 60 | 123 | 22 | 145 |
| FEA25 | 1  | MED | 211 | 141 | 69 | 114 | 28 | 142 |
|       | 6  |     | 199 | 120 | 66 | 109 | 24 | 133 |
|       | 9  |     | 202 | 101 | 63 | 119 | 20 | 139 |
|       | 15 |     | 203 | 97  | 62 | 122 | 19 | 141 |
| FEA26 | 1  | MED | 142 | 78  | 43 | 83  | 16 | 99  |
|       | 6  |     | 139 | 132 | 37 | 76  | 26 | 102 |
|       | 9  |     | 148 | 129 | 42 | 80  | 26 | 106 |
|       | 15 |     | 129 | 73  | 43 | 71  | 15 | 86  |
| FEA28 | 1  | MED | 204 | 104 | 49 | 134 | 21 | 155 |
|       | 6  |     | 194 | 96  | 47 | 128 | 19 | 147 |
|       | 9  |     | 201 | 205 | 45 | 115 | 41 | 156 |
|       | 15 |     | 204 | 127 | 50 | 129 | 25 | 154 |
| FEA29 | 1  | MED | 178 | 207 | 43 | 94  | 41 | 135 |
|       | 6  |     | 163 | 233 | 42 | 74  | 47 | 121 |
|       | 9  |     | 189 | 200 | 42 | 107 | 40 | 147 |
|       | 15 |     | 170 | 242 | 41 | 81  | 48 | 129 |
| FEA30 | 1  | MED | 150 | 154 | 49 | 70  | 31 | 101 |
|       | 6  |     | 137 | 177 | 54 | 48  | 35 | 83  |
|       | 9  |     |     |     |    |     |    |     |
|       | 15 |     |     |     |    |     |    |     |
